# Supplementary material for: Synthesis and evaluation of new modified diglycolamides with different stereochemistry for extraction of tri- and tetravalent metal ions
Source: Royal Society of Chemistry journal article supplement (doi:10.1039/d2nj05663a), 2023-01-01
Supplement: d2nj05663a1.pdf [file d2nj05663a1.pdf]

## Electronic Supplementary Information for

# Synthesis and evaluation of new modified diglycolamides with different stereochemistry for extraction of tri- and tetravalent metal ions

Laura Diaz Gomez<sup>1</sup>, Andreas Wilden<sup>1,\*</sup>, Dimitri Schneider<sup>1</sup>, Zaina Papparigas<sup>1</sup>, Giuseppe Modolo<sup>1</sup>, Maria Chiara Gullo<sup>2</sup>, Jurriaan Huskens<sup>2</sup>, Willem Verboom<sup>2</sup>

<sup>1</sup>Forschungszentrum Jülich GmbH, Institut für Energie–und Klimaforschung–Nukleare Entsorgung und Reaktorsicherheit (IEK-6), 52428 Jülich, Germany

<sup>2</sup>Laboratory of Molecular Nanofabrication, Department for Molecules & Materials, Mesa+ Institute for Nanotechnology, University of Twente, 7500 AE Enschede, The Netherlands

\*corresponding author: [a.wilden@fz-juelich.de](mailto:a.wilden@fz-juelich.de)

## Table of Content

|                                                                                                                                                                                                                                                |   |
|------------------------------------------------------------------------------------------------------------------------------------------------------------------------------------------------------------------------------------------------|---|
| Fig. S1. Am(III) and Cm(III) distribution ratios $D$ as a function of the HNO <sub>3</sub> concentration for different ligands (exp. conditions see main text Fig. 2). The data shown here is given in Table S1.                               | 3 |
| Fig. S2. Zr distribution ratios as a function of the HNO <sub>3</sub> concentration for the different extractants used in this study.                                                                                                          | 5 |
| Fig. S3. Mo distribution ratios as a function of the HNO <sub>3</sub> concentration for the different extractants used in this study.                                                                                                          | 5 |
| Fig. S4. Ru distribution ratios as a function of the HNO <sub>3</sub> concentration for the different extractants used in this study.                                                                                                          | 6 |
| Table S1. Am(III) and Cm(III) distribution ratios $D$ and Am/Cm separation factors $SF_{Am/Cm}$ at different HNO <sub>3</sub> concentrations. Values in <i>italics</i> are associated with higher uncertainties and must be handled with care. | 4 |
| Characterization data of newly synthesized compounds                                                                                                                                                                                           | 6 |
| <i>Ethyl (R)-2-(((S)-1-ethoxy-1-oxopropan-2-yl)oxy)butanoate (1A) and ethyl (S)-2-(((S)-1-ethoxy-1-oxopropan-2-yl)oxy)butanoate (1B)</i>                                                                                                       | 6 |
| <i>(R)-2-((S)-1-Carboxyethoxy)butanoic acid (2A)</i>                                                                                                                                                                                           | 6 |
| <i>(S)-2-((S)-1-Carboxyethoxy)butanoic acid (2B)</i>                                                                                                                                                                                           | 6 |
| <i>(S)-2-(((S)-1-(Di-n-octylamino)-1-oxopropan-2-yl)oxy)-N,N-di-n-octylbutanamide (4B)</i>                                                                                                                                                     | 7 |
| <i>(R)-N,N-Di-n-decyl-2-(((S)-1-(N,N-di-n-decylamino)-1-oxopropan-2-yl)oxy)butanamide (5A)</i>                                                                                                                                                 | 7 |
| <i>(S)-N,N-Di-n-decyl-2-(((S)-1-(N,N-di-n-decylamino)-1-oxopropan-2-yl)oxy)butanamide (5B)</i>                                                                                                                                                 | 7 |
| <i>Diethyl 2,2'-oxydipentanoate (6A and 6B)</i>                                                                                                                                                                                                | 7 |
| <i>2,2'-Oxydipentanoic acid (7A)</i>                                                                                                                                                                                                           | 7 |
| <i>2,2'-Oxydipentanoic acid (7B)</i>                                                                                                                                                                                                           | 7 |
| <i>2,2'-Oxybis(N,N-di-n-octylpentanamide) (9A)</i>                                                                                                                                                                                             | 7 |
| <i>2,2'-Oxybis(N,N-di-n-octylpentanamide) (9B)</i>                                                                                                                                                                                             | 8 |
| <i>2,2'-Oxybis(N,N-di-n-decylpentanamide) (10A)</i>                                                                                                                                                                                            | 8 |
| <i>2,2'-Oxybis(N,N-di-n-decylpentanamide) (10B)</i>                                                                                                                                                                                            | 8 |

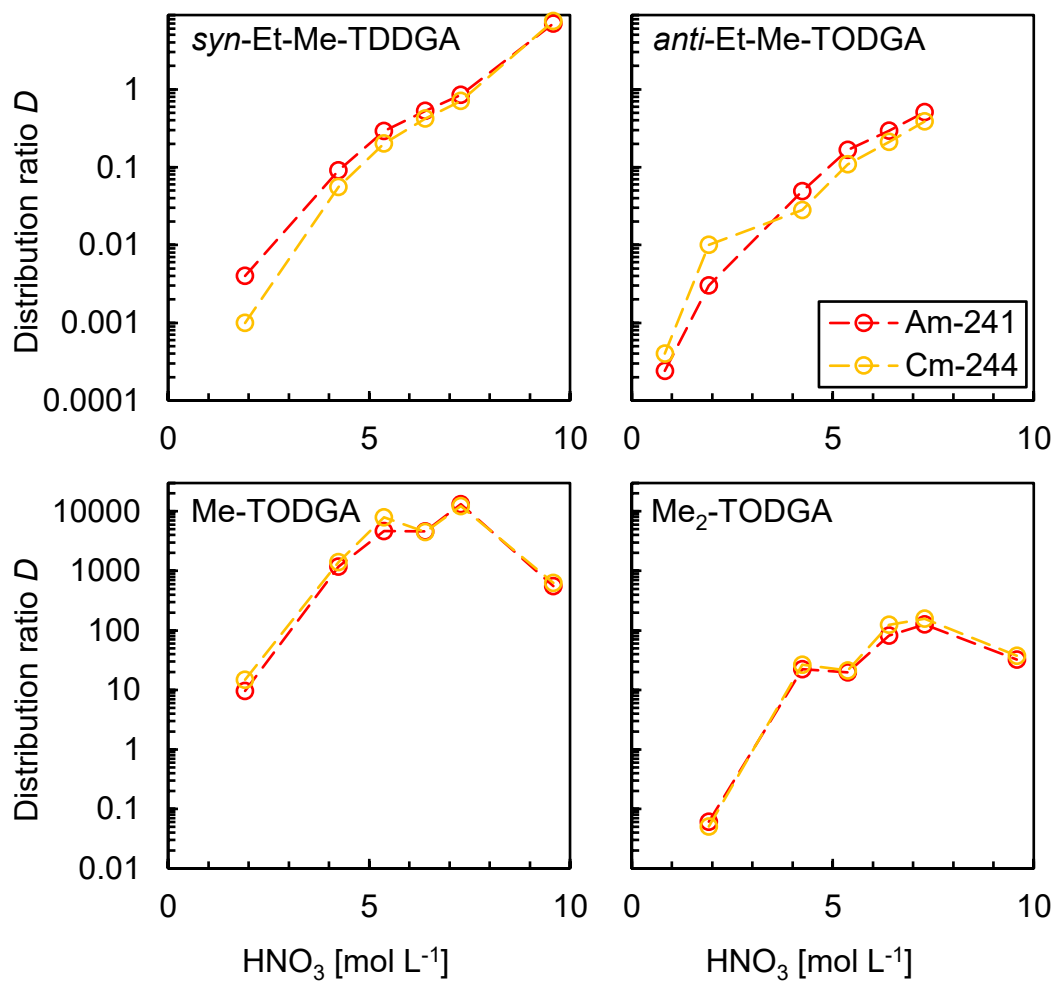

**Fig. S1.** Am(III) and Cm(III) distribution ratios  $D$  as a function of the  $\text{HNO}_3$  concentration for different ligands (exp. conditions see main text Fig. 2). The data shown here is given in Table S1.

**Table S1.** Am(III) and Cm(III) distribution ratios  $D$  and Am/Cm separation factors  $SF_{Am/Cm}$  at different  $HNO_3$  concentrations. Values in *italics* are associated with higher uncertainties and must be handled with care.

| HNO <sub>3</sub> | <i>syn</i> -Et-Me-TDDGA |                 |              | <i>anti</i> -Et-Me-TODGA |                 |              | Me-TODGA        |                 |              | Me <sub>2</sub> -TODGA |          |              |
|------------------|-------------------------|-----------------|--------------|--------------------------|-----------------|--------------|-----------------|-----------------|--------------|------------------------|----------|--------------|
|                  | $D(Am)$                 | $D(Cm)$         | $SF_{Am/Cm}$ | $D(Am)$                  | $D(Cm)$         | $SF_{Am/Cm}$ | $D(Am)$         | $D(Cm)$         | $SF_{Am/Cm}$ | $D(Am)$                | $D(Cm)$  | $SF_{Am/Cm}$ |
| 0.82             |                         |                 |              | <i>2.40E-04</i>          | <i>4.00E-04</i> | <i>0.6</i>   |                 |                 |              |                        |          |              |
| 1.91             | <i>4.00E-03</i>         | <i>1.00E-03</i> | <i>4.0</i>   | <i>3.00E-03</i>          | <i>1.00E-02</i> | <i>0.3</i>   | 9.60E+00        | 1.47E+01        | 0.7          | 6.13E-02               | 5.06E-02 | 1.2          |
| 4.24             | 9.10E-02                | 5.55E-02        | 1.6          | 4.90E-02                 | 2.80E-02        | 1.8          | <i>1.18E+03</i> | <i>1.41E+03</i> | <i>0.8</i>   | 2.22E+01               | 2.63E+01 | 0.8          |
| 5.37             | 2.90E-01                | 2.01E-01        | 1.4          | 1.67E-01                 | 1.09E-01        | 1.5          | <i>4.65E+03</i> | <i>7.93E+03</i> | <i>0.6</i>   | 1.97E+01               | 2.12E+01 | 0.9          |
| 6.40             | 5.30E-01                | 4.20E-01        | 1.3          | 2.95E-01                 | 2.10E-01        | 1.4          | <i>4.61E+03</i> | <i>4.47E+03</i> | <i>1.0</i>   | 8.18E+01               | 1.25E+02 | 0.7          |
| 7.28             | 8.50E-01                | 7.10E-01        | 1.2          | 5.07E-01                 | 3.88E-01        | 1.3          | <i>1.32E+04</i> | <i>1.23E+04</i> | <i>1.1</i>   | 1.26E+02               | 1.58E+02 | 0.8          |
| 9.58             | 7.02E+00                | 7.53E+00        | 0.9          |                          |                 |              | <i>5.58E+02</i> | <i>6.27E+02</i> | <i>0.9</i>   | 3.25E+01               | 3.74E+01 | 0.9          |

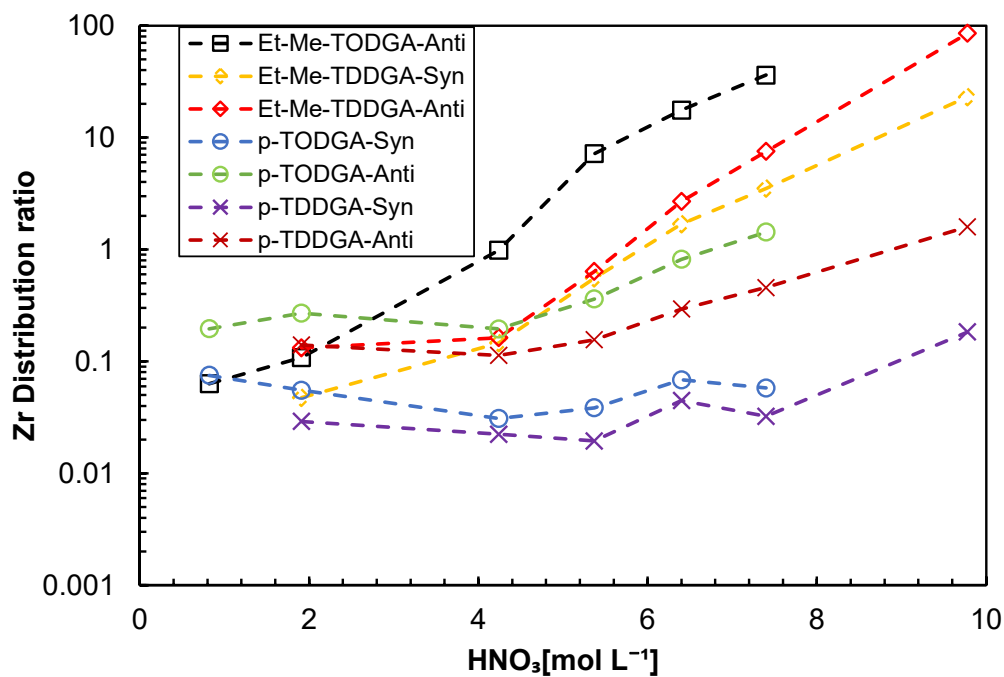

**Fig. S2.** Zr distribution ratios as a function of the HNO<sub>3</sub> concentration for the different extractants used in this study.

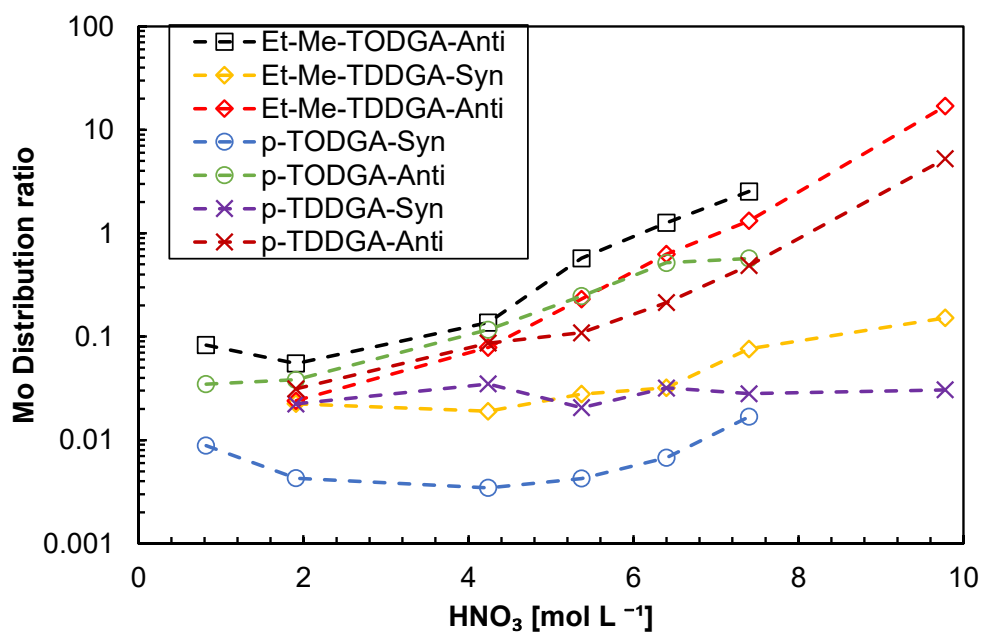

**Fig. S3.** Mo distribution ratios as a function of the HNO<sub>3</sub> concentration for the different extractants used in this study.

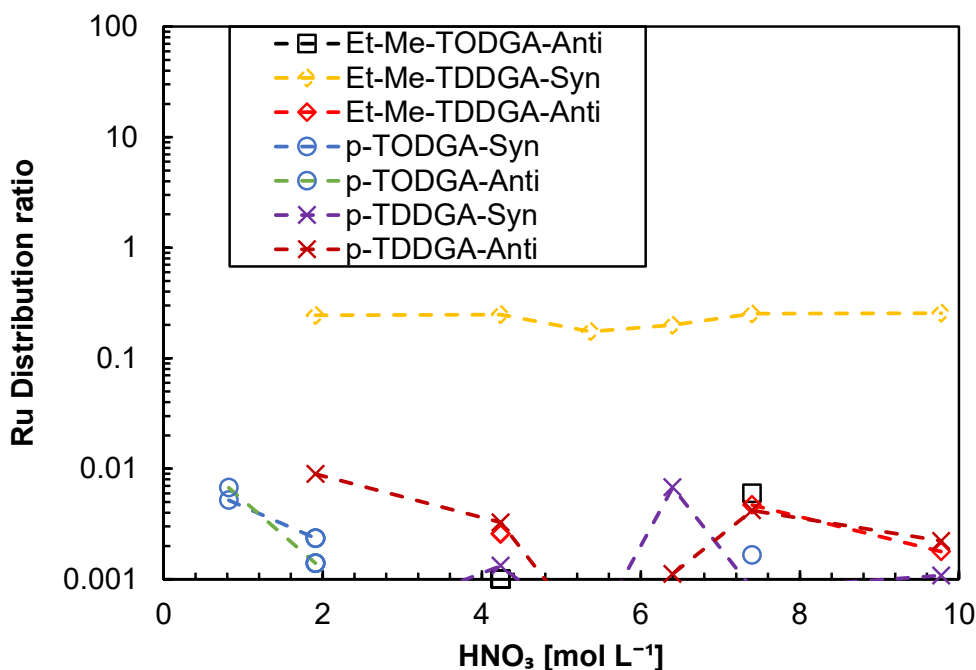

**Fig. S4.** Ru distribution ratios as a function of the HNO<sub>3</sub> concentration for the different extractants used in this study.

### Characterization data of newly synthesized compounds

#### *Ethyl (R)-2-(((S)-1-ethoxy-1-oxopropan-2-yl)oxy)butanoate (1A) and ethyl (S)-2-(((S)-1-ethoxy-1-oxopropan-2-yl)oxy)butanoate (1B)*

**1A:** <sup>1</sup>H NMR (400 MHz, CDCl<sub>3</sub>): d 1.04 (3H, t, *J* = 7.4 Hz, CH<sub>3</sub>CH<sub>2</sub>CH), 1.30 (6H, t, *J* = 7.2 Hz, CH<sub>3</sub>CH<sub>2</sub>OCO), 1.48 (3H, d, *J* = 6.8 Hz, CH<sub>3</sub>CH), 1.74-1.91 (2H, m, CH<sub>3</sub>CH<sub>2</sub>CH), 3.95 (1H, t, *J* = 5.0 Hz, CH<sub>3</sub>CH<sub>2</sub>CH), 4.05 (1H, q, *J* = 6.8 Hz, CH<sub>3</sub>CH), 4.15-4.29 (4H, m, CH<sub>3</sub>CH<sub>2</sub>OCO). <sup>13</sup>C NMR (100 MHz, CDCl<sub>3</sub>): d 172.9, 172.6, 79.1, 74.0, 60.85, 60.79, 26.4, 18.7, 14.2, 14.19, 9.7. IR (ν<sub>max</sub>/cm<sup>-1</sup>): 2981.8, 2937.5, 1730.3, 1447.6, 1369.9, 1268.4, 1192.5, 1127.1, 1045.9, 1022.3. ESI-MS: *m/z* 255.61 [100%; (M+Na)<sup>+</sup>].

**1B:** <sup>1</sup>H NMR (400 MHz, CDCl<sub>3</sub>): d 0.99 (3H, t, *J* = 7.4 Hz, CH<sub>3</sub>CH<sub>2</sub>CH), 1.29 (6H, t, *J* = 7.2 Hz, CH<sub>3</sub>CH<sub>2</sub>OCO), 1.44 (3H, d, *J* = 6.8 Hz, CH<sub>3</sub>CH), 1.75-1.86 (2H, m, CH<sub>3</sub>CH<sub>2</sub>CH), 3.89 (1H, t, *J* = 5.8 Hz, CH<sub>3</sub>CH<sub>2</sub>CH), 4.07 (1H, q, *J* = 6.8 Hz, CH<sub>3</sub>CH), 4.21 (4H, q, *J* = 7.2 Hz, CH<sub>3</sub>CH<sub>2</sub>OCO). <sup>13</sup>C NMR (100 MHz, CDCl<sub>3</sub>): d 172.4, 172.0, 80.1, 75.2, 60.9, 60.8, 26.0, 18.1, 14.2, 14.1, 9.6. IR (ν<sub>max</sub>/cm<sup>-1</sup>): 2981.8, 2937.5, 1730.3, 1447.6, 1369.9, 1268.4, 1192.5, 1127.1, 1045.9, 1022.3. ESI-MS: *m/z* 255.61 [100%; (M+Na)<sup>+</sup>].

#### *(R)-2-(((S)-1-Carboxyethoxy)butanoic acid (2A)*

<sup>1</sup>H NMR (400 MHz, CD<sub>3</sub>OD): d 1.02 (3H, t, *J* = 7.4 Hz, CH<sub>3</sub>CH<sub>2</sub>CH), 1.43 (3H, d, *J* = 6.8 Hz, CH<sub>3</sub>CH), 1.71-1.9 (2H, m, CH<sub>3</sub>CH<sub>2</sub>CH), 3.96 (1H, t, *J* = 6.8 Hz, CH<sub>3</sub>CH<sub>2</sub>CH), 4.06 (1H, q, *J* = 6.8 Hz, CH<sub>3</sub>CH). <sup>13</sup>C NMR (100 MHz, CD<sub>3</sub>OD): d 175.0, 174.7, 78.5, 73.6, 25.9, 17.6, 8.5. IR (ν<sub>max</sub>/cm<sup>-1</sup>): 2980.3, 1704.7, 1465.2, 1450.4, 1419.5, 1246.2, 1161.8, 1131.7, 1069.8. ESI-MS: *m/z* 199.53 [100%; (M+Na)<sup>+</sup>].

#### *(S)-2-(((S)-1-Carboxyethoxy)butanoic acid (2B)*

<sup>1</sup>H NMR (400 MHz, CD<sub>3</sub>OD): d 0.89 (3H, t, *J* = 7.4 Hz, CH<sub>3</sub>CH<sub>2</sub>CH), 1.31 (3H, d, *J* = 6.8 Hz, CH<sub>3</sub>CH), 1.59-1.8 (2H, m, CH<sub>3</sub>CH<sub>2</sub>CH), 3.92 (1H, t, *J* = 7.0 Hz, CH<sub>3</sub>CH<sub>2</sub>CH), 4.04 (1H, q, *J* = 6.8 Hz, CH<sub>3</sub>CH). <sup>13</sup>C NMR (100 MHz, CD<sub>3</sub>OD): d 174.2, 173.4, 79.3, 74.7, 25.4, 17.0, 8.3. IR (ν<sub>max</sub>/cm<sup>-1</sup>): 2980.3, 1704.7, 1465.2, 1450.4, 1419.5, 1246.2, 1161.8, 1131.7, 1069.8. ESI-MS: *m/z* 199.53 [100%; (M+Na)<sup>+</sup>].

**(S)-2-(((S)-1-(Di-n-octylamino)-1-oxopropan-2-yl)oxy)-N,N-di-n-octylbutanamide (4B)**

<sup>1</sup>H NMR (400 MHz, CDCl<sub>3</sub>): d 0.88-0.92 (12H, br s, N(CH<sub>2</sub>)<sub>7</sub>CH<sub>3</sub>), 1.04 (3H, t, *J* = 7.2 Hz, CH<sub>3</sub>CH<sub>2</sub>CH), 1.29 (40H, s, NCH<sub>2</sub>CH<sub>2</sub>(CH<sub>2</sub>)<sub>5</sub>CH<sub>3</sub>), 1.41 (3H, d, *J* = 6.4 Hz, CH<sub>3</sub>CH), 1.52 (8H, br s, NCH<sub>2</sub>CH<sub>2</sub>), 1.67-1.83 (2H, m, CH<sub>3</sub>CH<sub>2</sub>CH), 3.05-3.32 + 3.48-3.55 (8H, m, NCH<sub>2</sub>CH<sub>2</sub>(CH<sub>2</sub>)<sub>5</sub>CH<sub>3</sub>), 4.09 (1H, br t, CH<sub>3</sub>CH<sub>2</sub>CH), 4.28 (1H, q, *J* = 6.6 Hz, CH<sub>3</sub>CH). IR (ν<sub>max</sub>/cm<sup>-1</sup>): 2954.9, 2922.9, 2854.6, 1646.1, 1464.1, 1427.0, 1376.5, 1110.9. ESI-MS: *m/z* 646.83 [100%; (M+Na)<sup>+</sup>].

**(R)-N,N-Di-n-decyl-2-(((S)-1-(N,N-di-n-decylamino)-1-oxopropan-2-yl)oxy)butanamide (5A)**

<sup>1</sup>H NMR (400 MHz, CDCl<sub>3</sub>): d 0.88-0.92 (12H, m, NCH<sub>2</sub>CH<sub>2</sub>(CH<sub>2</sub>)<sub>7</sub>CH<sub>3</sub>), 1.06 (3H, t, *J* = 7.2 Hz, CH<sub>3</sub>CH<sub>2</sub>CH), 1.29 (56H, s, NCH<sub>2</sub>(CH<sub>2</sub>)<sub>7</sub>CH<sub>3</sub>), 1.41 (3H, d, *J* = 6.3 Hz, CH<sub>3</sub>CH), 1.52 (8H, br s, NCH<sub>2</sub>CH<sub>2</sub>(CH<sub>2</sub>)<sub>7</sub>CH<sub>3</sub>), 1.68-1.85 (2 H, m, CH<sub>3</sub>CH<sub>2</sub>CH), 3.05-3.32 + 3.48-3.56 (8H, m, NCH<sub>2</sub>CH<sub>2</sub>(CH<sub>2</sub>)<sub>7</sub>CH<sub>3</sub>), 4.08 (1H, br t, CH<sub>3</sub>CH<sub>2</sub>CH), 4.28 (1H, q, *J* = 6.5 Hz, CH<sub>3</sub>CH). IR (ν<sub>max</sub>/cm<sup>-1</sup>): ESI-MS: 757.65 *m/z* [100%; (M+Na)<sup>+</sup>].

**(S)-N,N-Di-n-decyl-2-(((S)-1-(N,N-di-n-decylamino)-1-oxopropan-2-yl)oxy)butanamide (5B)**

<sup>1</sup>H NMR (400 MHz, CDCl<sub>3</sub>): d 0.88-0.95 (15H, m, NCH<sub>2</sub>CH<sub>2</sub>(CH<sub>2</sub>)<sub>7</sub>CH<sub>3</sub> + CH<sub>3</sub>CH<sub>2</sub>CH), 1.32 (59H, br s, NCH<sub>2</sub>(CH<sub>2</sub>)<sub>7</sub>CH<sub>3</sub> + CH<sub>3</sub>CH<sub>2</sub>CH), 1.53 (8H, br s, NCH<sub>2</sub>CH<sub>2</sub>(CH<sub>2</sub>)<sub>7</sub>CH<sub>3</sub>), 1.69-1.81 (2H, m, CH<sub>3</sub>CH<sub>2</sub>CH), 3.16-3.59 (8H, m, NCH<sub>2</sub>CH<sub>2</sub>(CH<sub>2</sub>)<sub>7</sub>CH<sub>3</sub>), 4.16-4.21 (1H, br t, CH<sub>3</sub>CH<sub>2</sub>CH), 4.44 (1H, q, *J* = 6.5 Hz, CH<sub>3</sub>CH). IR (ν<sub>max</sub>/cm<sup>-1</sup>): 2921.3, 2852.5, 1750.7, 1649.8, 1464.3, 1375.8, 1200.9, 1112.2. ESI-MS: 757.45 *m/z* [100%; (M+Na)<sup>+</sup>].

**Diethyl 2,2'-oxydipentanoate (6A and 6B)**

**6A:** <sup>1</sup>H NMR (400 MHz, CDCl<sub>3</sub>): d 0.95 (6H, t, *J* = 7.4 Hz, CH<sub>3</sub>CH<sub>2</sub>OCO), 1.30 (6H, t, *J* = 7.2 Hz, CH<sub>3</sub>CH<sub>2</sub>), 1.46-1.56 (4H, m, CH<sub>3</sub>CH<sub>2</sub>CH<sub>2</sub>CH), 1.74-1.79 (4H, m, CH<sub>3</sub>CH<sub>2</sub>CH<sub>2</sub>CH), 3.96 (2H, t, *J* = 6.2 Hz, COCHO), 4.15-4.28 (4H, m, CH<sub>3</sub>CH<sub>2</sub>OCO). <sup>13</sup>C NMR (100 MHz, CDCl<sub>3</sub>): d 172.7, 77.7, 60.7, 35.3, 18.5, 14.2, 13.8. IR (ν<sub>max</sub>/cm<sup>-1</sup>): 2962.5, 2874.7, 1747.6, 1732.2, 1466.6, 1380.8, 1265.0, 1190.1, 1130.5, 1096.3, 1025.2. ESI-MS: *m/z* 297.64 [100%; (M+Na)<sup>+</sup>].

**6B:** <sup>1</sup>H NMR (400 MHz, CDCl<sub>3</sub>): d 0.95 (6H, t, *J* = 7.4 Hz, CH<sub>3</sub>CH<sub>2</sub>OCO), 1.30 (6H, t, *J* = 7.2 Hz, CH<sub>3</sub>CH<sub>2</sub>), 1.37-1.55 (4H, m, CH<sub>3</sub>CH<sub>2</sub>CH<sub>2</sub>CH), 1.98-1.84 (4H, m, CH<sub>3</sub>CH<sub>2</sub>CH<sub>2</sub>CH), 3.89 (2H, t, *J* = 6.2 Hz, COCHO), 4.20 (4H, q, *J* = 7.1 Hz, CH<sub>3</sub>CH<sub>2</sub>OCO). <sup>13</sup>C NMR (100 MHz, CDCl<sub>3</sub>): d 172.2, 79.7, 60.8, 34.9, 18.5, 14.2, 13.8. IR (ν<sub>max</sub>/cm<sup>-1</sup>): 2960.8, 2875.2, 1750.4, 1730.8, 1466.5, 1368.3, 1271.5, 1185.6, 1128.3, 1028.2. ESI-MS: *m/z* 297.66 [100%; (M+Na)<sup>+</sup>].

**2,2'-Oxydipentanoic acid (7A)**

<sup>1</sup>H NMR (400 MHz, CDCl<sub>3</sub>): d 0.97 (6H, t, *J* = 7.0 Hz, CH<sub>3</sub>CH<sub>2</sub>CH<sub>2</sub>CH), 1.56 (4H, sext, *J* = 7.7 Hz, CH<sub>3</sub>CH<sub>2</sub>CH<sub>2</sub>CH), 1.84 (4H, q, *J* = 6.1 Hz, CH<sub>3</sub>CH<sub>2</sub>CH<sub>2</sub>CH), 4.1 (2H, t, *J* = 6.0 Hz, CH<sub>3</sub>CH<sub>2</sub>CH<sub>2</sub>CH). <sup>13</sup>C NMR (100 MHz, CDCl<sub>3</sub>): d 178.3, 77.3, 35.1, 18.3, 13.7. IR (ν<sub>max</sub>/cm<sup>-1</sup>): 2963.7, 2875.4, 1717.7, 1455.0, 1420.9, 1254.2, 1208.7, 1132.3, 1094.5. ESI-MS: *m/z* 241.57 [100%; (M+Na)<sup>+</sup>].

**2,2'-Oxydipentanoic acid (7B)**

<sup>1</sup>H NMR (400 MHz, CDCl<sub>3</sub>): d 0.99 (6H, t, *J* = 7.4 Hz, CH<sub>3</sub>CH<sub>2</sub>CH<sub>2</sub>CH), 1.50 (4H, sext, *J* = 7.4 Hz, CH<sub>3</sub>CH<sub>2</sub>CH<sub>2</sub>CH), 1.82-1.87 (4H, q, *J* = 6.0 Hz, CH<sub>3</sub>CH<sub>2</sub>CH<sub>2</sub>CH), 4.01 (2H, t, *J* = 6.0 Hz, CH<sub>3</sub>CH<sub>2</sub>CH<sub>2</sub>CH). <sup>13</sup>C NMR (100 MHz, CDCl<sub>3</sub>): d 175.8, 80.0, 34.5, 18.2, 13.8. IR (ν<sub>max</sub>/cm<sup>-1</sup>): 2960.6, 2875.4, 1715.6, 1380.24, 1212.7, 1123.8, 1092.7. ESI-MS: *m/z* 241.59 [100%; (M+Na)<sup>+</sup>].

**2,2'-Oxybis(N,N-di-n-octylpentanamide) (9A)**

<sup>1</sup>H NMR (400 MHz, CDCl<sub>3</sub>): d 0.85-0.97 (18H, m, N(CH<sub>2</sub>)<sub>7</sub>CH<sub>3</sub> + CHCH<sub>2</sub>CH<sub>2</sub>CH<sub>3</sub>), 1.28-1.33 (44H, br s, NCH<sub>2</sub>CH<sub>2</sub>(CH<sub>2</sub>)<sub>5</sub>CH<sub>3</sub>, CHCH<sub>2</sub>CH<sub>2</sub>CH<sub>3</sub>), 1.44-1.55 (8H, m, NCH<sub>2</sub>CH<sub>2</sub>(CH<sub>2</sub>)<sub>5</sub>CH<sub>3</sub>), 1.67-1.78 (4H, m, CHCH<sub>2</sub>CH<sub>2</sub>CH<sub>3</sub>), 3.00-3.08, 3.09-3.15, 3.28-3.36, 3.50-3.57 (2H each, m, CH<sub>2</sub>CH<sub>2</sub>(CH<sub>2</sub>)<sub>5</sub>CH<sub>3</sub>), 4.14 (2H, t, *J* = 6.4 Hz, CHCH<sub>2</sub>CH<sub>2</sub>CH<sub>3</sub>). <sup>13</sup>C NMR (100 MHz, CDCl<sub>3</sub>): d 171.4, 75.5, 47.1, 46.1, 35.7, 31.8, 29.4, 29.3, 29.29, 29.2, 27.7, 27.1, 26.9, 22.6, 18.9, 14.1, 18.9, 14.1, 14.0. IR (ν<sub>max</sub>/cm<sup>-1</sup>): 2956.3, 2923.5, 2854.4, 1653.2, 1458.2, 1425.7, 1377.4, 1120.1, 1091. ESI-MS: *m/z* 687.61 [100%; (M+Na)<sup>+</sup>].

**2,2'-Oxybis(N,N-di-n-octylpentanamide) (9B)**

<sup>1</sup>H NMR (400 MHz, CDCl<sub>3</sub>): <sup>1</sup>H NMR (400 MHz, CDCl<sub>3</sub>): d 0.89-0.95 (18H, m, N(CH<sub>2</sub>)<sub>7</sub>CH<sub>3</sub> + CHCH<sub>2</sub>CH<sub>2</sub>CH<sub>3</sub>), 1.30 (40 H, s, NCH<sub>2</sub>CH<sub>2</sub>(CH<sub>2</sub>)<sub>5</sub>CH<sub>3</sub>), 1.3-1.4 (4H, m, CHCH<sub>2</sub>CH<sub>2</sub>CH<sub>3</sub>), 1.5-1.73 (12H, m, NCH<sub>2</sub>CH<sub>2</sub>(CH<sub>2</sub>)<sub>5</sub>CH<sub>3</sub> + CHCH<sub>2</sub>CH<sub>2</sub>CH<sub>3</sub>), 3.21-3.53 (8H, m, NCH<sub>2</sub>CH<sub>2</sub>(CH<sub>2</sub>)<sub>5</sub>CH<sub>3</sub>), 4.29 (2H, t, *J* = 6.5 Hz, CHCH<sub>2</sub>CH<sub>2</sub>CH<sub>3</sub>). <sup>13</sup>C NMR (100 MHz, CDCl<sub>3</sub>): d 171.6, 76.6, 46.8, 34.8, 31.8, 31.77, 29.4, 29.3, 27.4, 27.1, 26.9, 22.6, 18.9, 14.1, 14.0. IR (ν<sub>max</sub>/cm<sup>-1</sup>): 2956.1, 2923.6, 2854.2, 1651.9, 1458.8, 1426.7, 1377.3, 1111.2, 1085.3. ESI-MS: *m/z* 688.18 [100%; (M+Na)<sup>+</sup>].

**2,2'-Oxybis(N,N-di-n-decylpentanamide) (10A)**

<sup>1</sup>H NMR (400 MHz, CDCl<sub>3</sub>): d 0.88-0.97 (18H, m, N(CH<sub>2</sub>)<sub>7</sub>CH<sub>3</sub> + CHCH<sub>2</sub>CH<sub>2</sub>CH<sub>3</sub>), 1.29 (56H, br s, NCH<sub>2</sub>CH<sub>2</sub>(CH<sub>2</sub>)<sub>7</sub>CH<sub>3</sub>), 1.44-1.78 (16H, m, NCH<sub>2</sub>CH<sub>2</sub>(CH<sub>2</sub>)<sub>6</sub>CH<sub>3</sub> + CHCH<sub>2</sub>CH<sub>2</sub>CH<sub>3</sub>), 3.01-3.57 (8H, m, NCH<sub>2</sub>CH<sub>2</sub>(CH<sub>2</sub>)<sub>7</sub>CH<sub>3</sub>), 4.13-4.16 (2H, m, CHCH<sub>2</sub>CH<sub>2</sub>CH<sub>3</sub>). <sup>13</sup>C NMR (100 MHz, CDCl<sub>3</sub>): d 171.4, 75.4, 47.2, 46.1, 35.6, 31.9, 29.64, 29.59, 29.6, 29.5, 29.44, 29.41, 29.3, 27.6, 27.1, 27.0, 22.7, 18.9, 14.1, 14.0. IR (ν<sub>max</sub>/cm<sup>-1</sup>): 2956.2, 2921.4, 2852.8, 1653.3, 1465.4, 1425.7, 1376.9, 1121.0, 1089.7. ESI-MS: *m/z* 799.62 [100%; (M+Na)<sup>+</sup>].

**2,2'-Oxybis(N,N-di-n-decylpentanamide) (10B)**

<sup>1</sup>H NMR (400 MHz, CDCl<sub>3</sub>): d 0.89-0.95 (18H, m, N(CH<sub>2</sub>)<sub>7</sub>CH<sub>3</sub> + CHCH<sub>2</sub>CH<sub>2</sub>CH<sub>3</sub>), 1.29 (56H, br s, NCH<sub>2</sub>CH<sub>2</sub>(CH<sub>2</sub>)<sub>7</sub>CH<sub>3</sub>), 1.5-1.73 + 2.00 (16H, m, NCH<sub>2</sub>CH<sub>2</sub>(CH<sub>2</sub>)<sub>6</sub>CH<sub>3</sub> + CHCH<sub>2</sub>CH<sub>2</sub>CH<sub>3</sub>), 3.21-3.53 (8H, m, NCH<sub>2</sub>CH<sub>2</sub>(CH<sub>2</sub>)<sub>7</sub>CH<sub>3</sub>), 4.33 (2H, t, *J* = 6.5 Hz, CHCH<sub>2</sub>CH<sub>2</sub>CH<sub>3</sub>). <sup>13</sup>C NMR (100 MHz, CDCl<sub>3</sub>): d 171.1, 75.4, 47.4, 46.4, 34.5, 31.9, 31.9, 29.62, 29.60, 29.57, 29.53, 29.45, 29.42, 29.41, 29.3, 27.5, 27.1, 27.0, 22.7, 18.9, 14.1, 14.0. IR (ν<sub>max</sub>/cm<sup>-1</sup>): 2956.6, 2921.4, 2852.7, 1652.7, 1465.2, 1427.0, 1377.4, 1110.7, 1079.9. ESI-MS: *m/z* 799.58 [100%; (M+Na)<sup>+</sup>].
